# Supplementary material
Source: PubMed Central journal article supplement (PMC2519009)
Supplement: NIHMS56248-supplement-02.pdf [file NIHMS56248-supplement-02.pdf]

Supplementary Table 1

Performance of the patients with parietal lobe lesions and control participants on a range of neuropsychological tests

| Tests                                  | Parietal patients |       |                  |      | Controls <sup>^</sup> |       |
|----------------------------------------|-------------------|-------|------------------|------|-----------------------|-------|
|                                        | L2                | L3    | L4               | R1   | M                     | S.D.  |
| Mini-mental state exam (30)            | 30                | 28    | 29               | 30   | 29.17                 | 0.98  |
| Line bisection error (mm) <sup>a</sup> | 2.5               | 2.8   | 2                | -1.3 | -0.26                 | 2.97  |
| Target cancellation (misses/60)        | 1                 | 7*    | 2                | 0    | 1.00                  | 1.26  |
| Spatial bias <sup>b</sup>              | 0.46              | 0.68* | 0.54             | 0.48 | 0.49                  | 0.06  |
| NART premorbid IQ (50)                 | 47                | 41    | 39               | 42   | 42.50                 | 5.05  |
| Boston naming test (60)                | 59                | 59    | 55               | 60   | 59.20                 | 1.79  |
| Letter fluency                         | 52                | 44    | 42               | 51   | 52.83                 | 9.52  |
| Trail making test—B (sec)              | 70                | 103*  | 68               | 76   | 60.00                 | 20.98 |
| Rey figure copy (36)                   | 35                | 36    | N/A              | 36   | 35.60                 | 0.89  |
| Rey figure delayed recall (36)         | 24                | 19.5  | N/A              | 22   | 19.90                 | 6.21  |
| Digit span score (30)                  | 24                | 12*   | 13 <sup>^^</sup> | 22   | 22.40                 | 3.36  |

L: left parietal lesion; R: right parietal lesion.

<sup>a</sup> Mean error from true midpoint in three bisections of lines 205mm in length (-ve left, +ve right).<sup>b</sup> Scores <0.5 = bias to right; scores >0.5 = bias to left.

\* Significant impairment compared with controls.

<sup>^</sup> From Simons et al. (in press)<sup>^^</sup> Forward only
