# Supplementary material
Source: PubMed Central journal article supplement (PMC2519009)

Supplemental Figure 1.

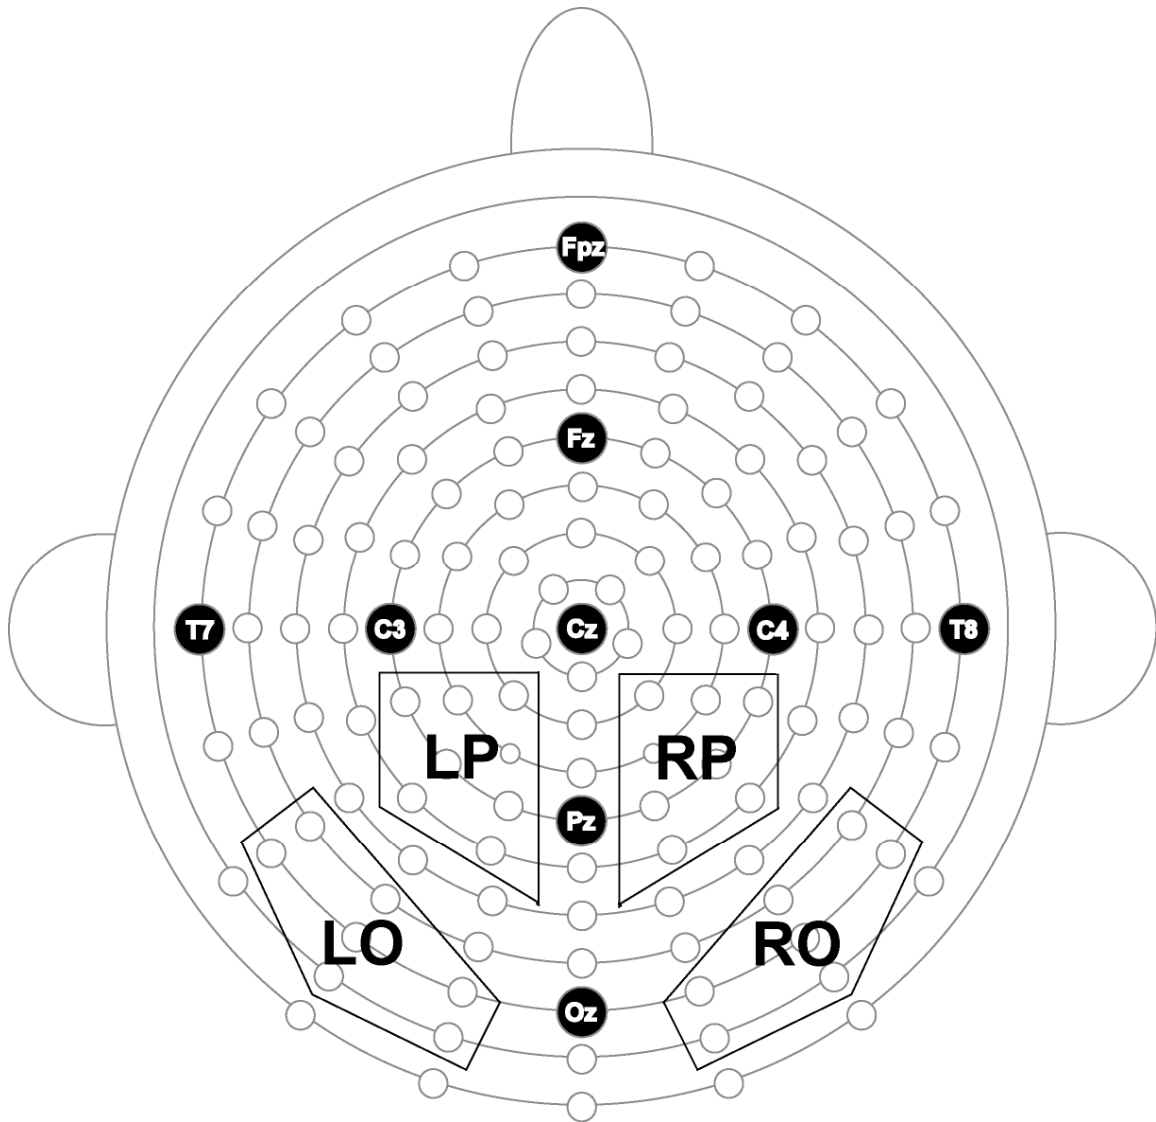

Supplement: NIHMS56248-supplement-03.pdf [file NIHMS56248-supplement-03.pdf]

Supplemental Figure 2

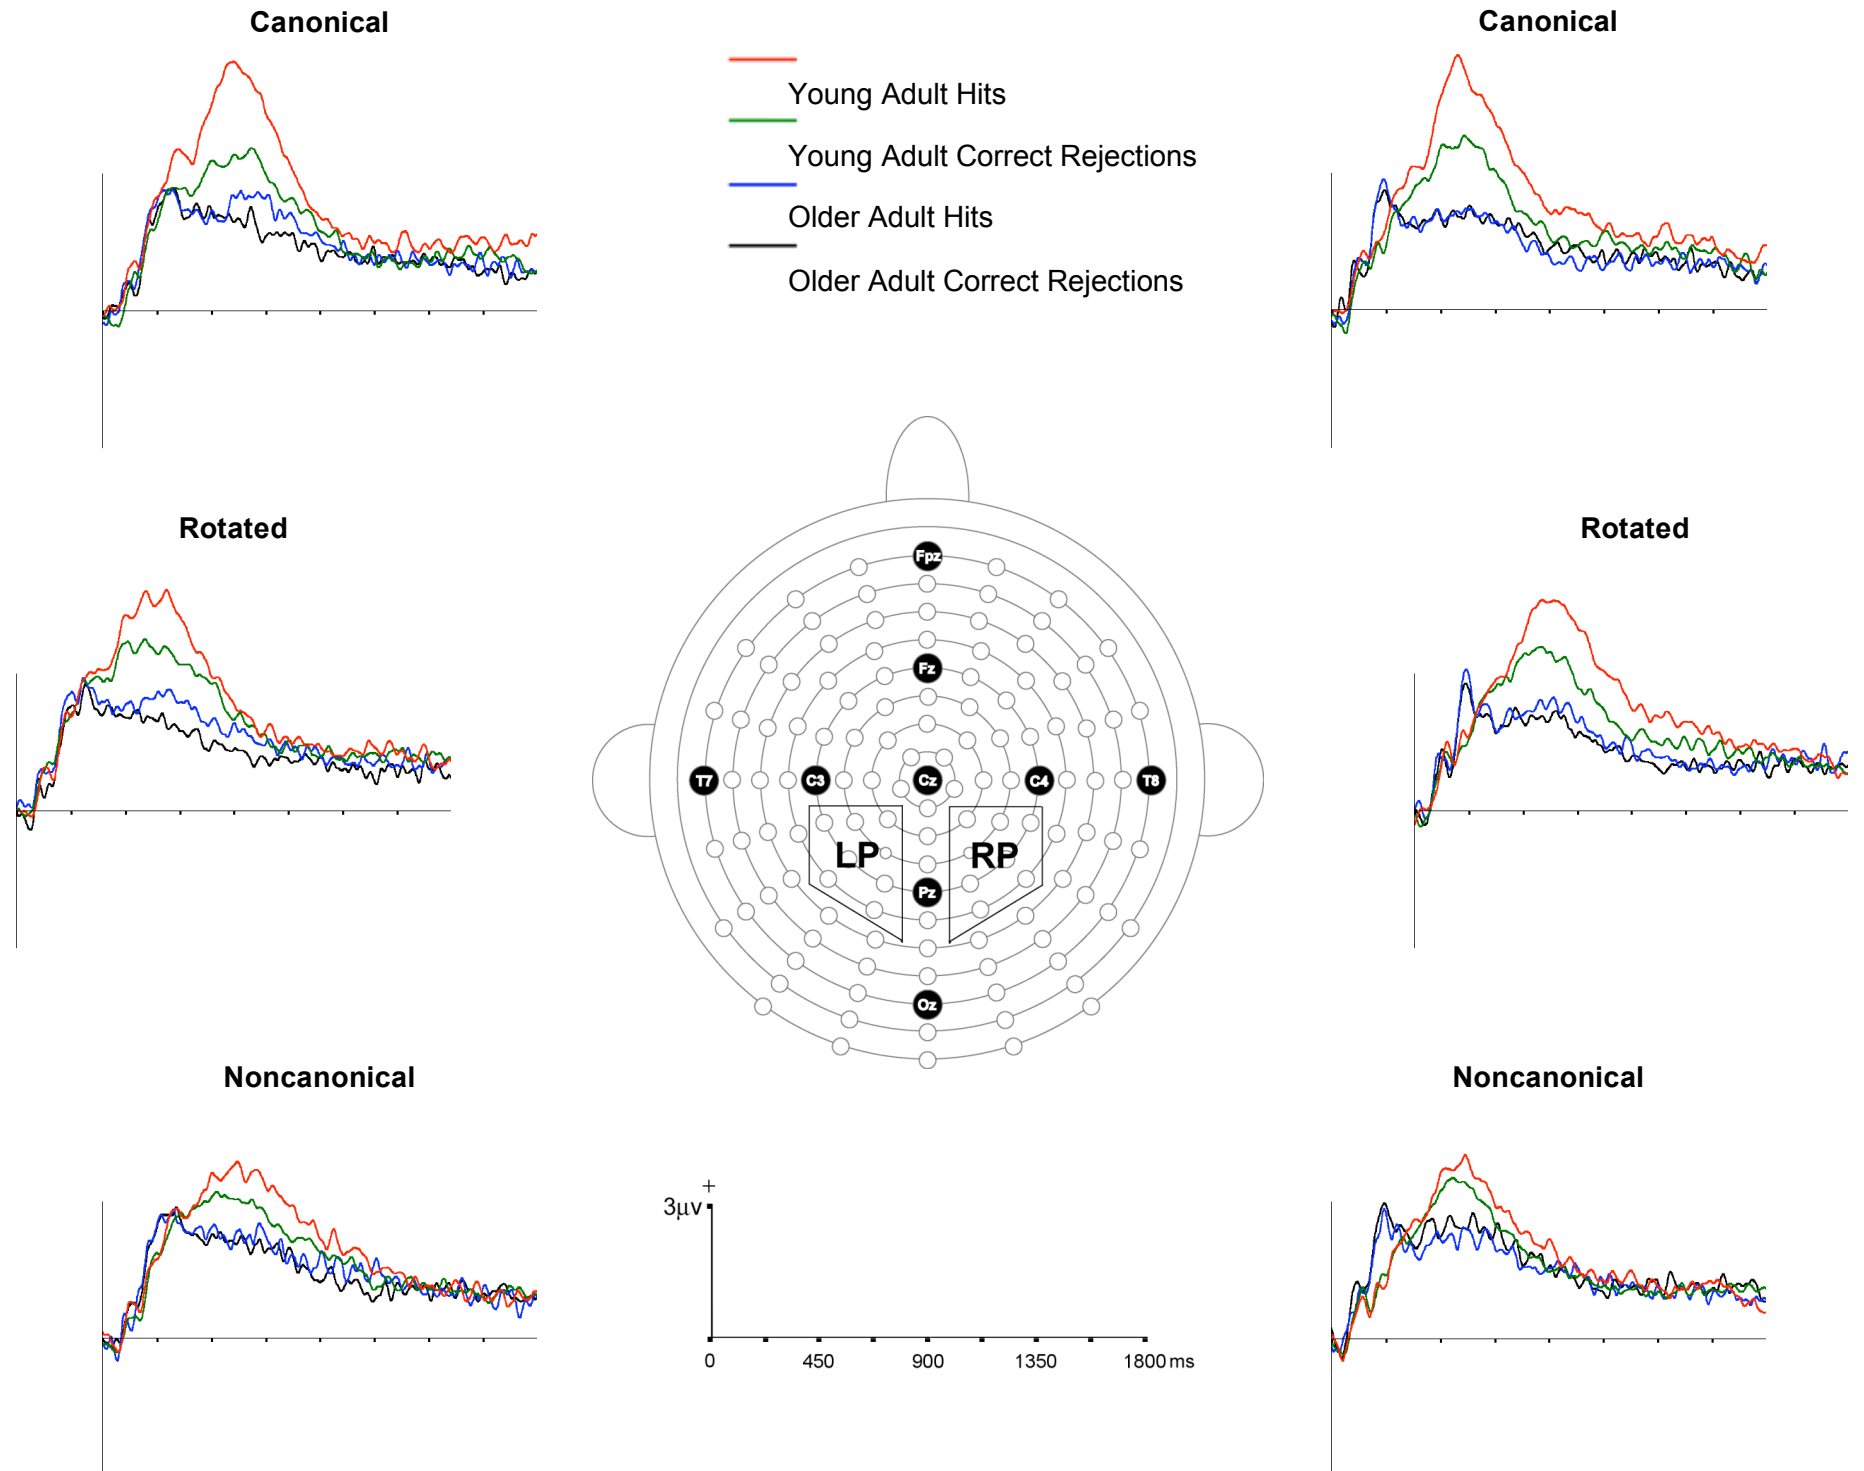

Supplement: NIHMS56248-supplement-04.pdf [file NIHMS56248-supplement-04.pdf]
